# Supplementary material for: Fergusonite-type rare earth niobates ANbO4 (A = Nd, Sm, and Eu) as electrode modifiers: deep insights into A site variations towards bifunctional electrochemical sensing applications
Source: Royal Society of Chemistry journal article supplement (doi:10.1039/d3nr00127j), 2023-01-01
Supplement: d3nr00127j1.pdf [file d3nr00127j1.pdf]

### **Supporting information**

#### **Fergusonite - type rare earth niobates $\text{ANbO}_4$ (A = Nd, Sm, Eu) as electrode modifiers: Deep insight into A site variations towards bifunctional electrochemical sensing application**

**I. Jenisha Daisy Priscillal, Sea-Fue Wang,<sup>a,\*</sup>**

<sup>a</sup>Department of Materials and Mineral Resources Engineering, National Taipei University of Technology, No. 1, Sec. 3, Chung-Hsiao East Rd., Taipei 106, Taiwan.

Corresponding authors:

\*S.-F. Wang, Email: [sfwang@ntut.edu.tw](mailto:sfwang@ntut.edu.tw)

#### **S1. Chemicals and reagents**

Neodymium nitrate ( $\text{Nd}(\text{NO}_3)_3$   $\geq 99\%$  purity), Samarium nitrate ( $\text{Sm}(\text{NO}_3)_3$   $\geq 99\%$  purity), Europium nitrate ( $\text{Eu}(\text{NO}_3)_3$   $\geq 99\%$  purity), Niobium pentachloride ( $\text{NbCl}_5$   $\geq 99\%$  purity), hydrogen peroxide ( $\text{H}_2\text{O}_2$ ) and urea ( $\text{CH}_4\text{N}_2\text{O}$ ) were purchased from Sigma Aldrich and carbon nanofibers (CNFs) were purchased from Rur-Grapheneox Company. All other necessary reagents and the above-mentioned chemicals have been used without further refinement. 0.1M (pH 7) phosphate buffer solution (PBS) prepared using sodium phosphate dibasic ( $\text{Na}_2\text{HPO}_4$ ) and sodium dihydrogen phosphate ( $\text{NaH}_2\text{PO}_4$ ) had been used as supporting electrolytes in all electrochemical experiments. All the experiments used ultrapure fresh water obtained from a Millipore water purification system (Milli-Q, specific resistivity  $> 18\text{M}\Omega\text{cm}$ , S.A., Molsheim, France).

#### **S2. Instrumentations**

Phase configurational analysis was performed through X-ray diffraction (XRD), Rigaku D/maxB, and DMX-2200). X-ray photoelectron spectroscopy ESCA/Auger Laboratory (National Taiwan University, Taiwan) is applied to quantitatively analyze the chemical composition of the materials. The surface morphology and elemental composition of the as-prepared nanocomposite were studied employing high resolution (HR) transmission electron microscopy (H-7600, Hitachi-Japan) operating at 200 kV and scanning electron microscopy (SEM, Hitachi S4700) and energy dispersive X-ray (EDX, HORIBA EMAX XACT) spectroscopy. AC impedance spectroscopy was performed by  $\Omega$ -metrohm autolab (AUT51770, 100-240V~ 75VA50/60 Hz). CHI 1205A

electrocatalytic work station was efficient to carry out the electrochemical measurements in three-electrode cells, as well as the amperometric method. Here, the modified GCE, saturated Ag/AgCl, and Pt wire were active as working, reference, and counter electrodes, respectively.

**Table S1: Comparison of crystallographic properties.**

| <b>Crystallites</b>                                       | <b>NdNbO<sub>4</sub></b>                   | <b>SmNbO<sub>4</sub></b>                   | <b>EuNbO<sub>4</sub></b>                   |
|-----------------------------------------------------------|--------------------------------------------|--------------------------------------------|--------------------------------------------|
| Crystal type                                              | Fergusonite                                | Fergusonite                                | Fergusonite                                |
| Crystal system                                            | Monoclinic                                 | Monoclinic                                 | Monoclinic                                 |
| Space group                                               | I2                                         | I2                                         | I2                                         |
| Space group number                                        | 5                                          | 5                                          | 5                                          |
| a (Å)                                                     | 5.4680                                     | 5.4210                                     | 5.3930                                     |
| b (Å)                                                     | 11.2800                                    | 11.1700                                    | 11.1300                                    |
| c (Å)                                                     | 5.1470                                     | 5.1200                                     | 5.1120                                     |
| Lattice angles                                            | $\alpha = \gamma = 90^\circ, \beta = 94.7$ | $\alpha = \gamma = 90^\circ, \beta = 94.7$ | $\alpha = \gamma = 90^\circ, \beta = 94.7$ |
| Density (g/cm <sup>3</sup> )                              | 12.60                                      | 13.20                                      | 6.71                                       |
| The volume of the cell (10 <sup>6</sup> pm <sup>3</sup> ) | 316.45                                     | 308.99                                     | 305.82                                     |
| Crystal size (nm)                                         | 43.06                                      | 29.47                                      | 39.7                                       |

**Table S2: Atomic % of Ln/Nb/O elements calculated from XPS and EDX**

| <b>LnNbO<sub>4</sub></b> | <b>Elements</b> | <b>Atomic% (From XPS)</b> | <b>Atomic% (From EDX)</b> |
|--------------------------|-----------------|---------------------------|---------------------------|
| NdNbO <sub>4</sub>       | Nd              | 19.67                     | 28.57                     |
|                          | Nb              | 15.01                     | 14.64                     |
|                          | O               | 64.32                     | 58.99                     |
| SmNbO <sub>4</sub>       | Sm              | 12.99                     | 27.35                     |
|                          | Nb              | 17.84                     | 18.57                     |
|                          | O               | 69.17                     | 54.08                     |
| EuNbO <sub>4</sub>       | Eu              | 16.91                     | 28.92                     |
|                          | Nb              | 17.32                     | 10.91                     |
|                          | O               | 65.77                     | 67.0                      |

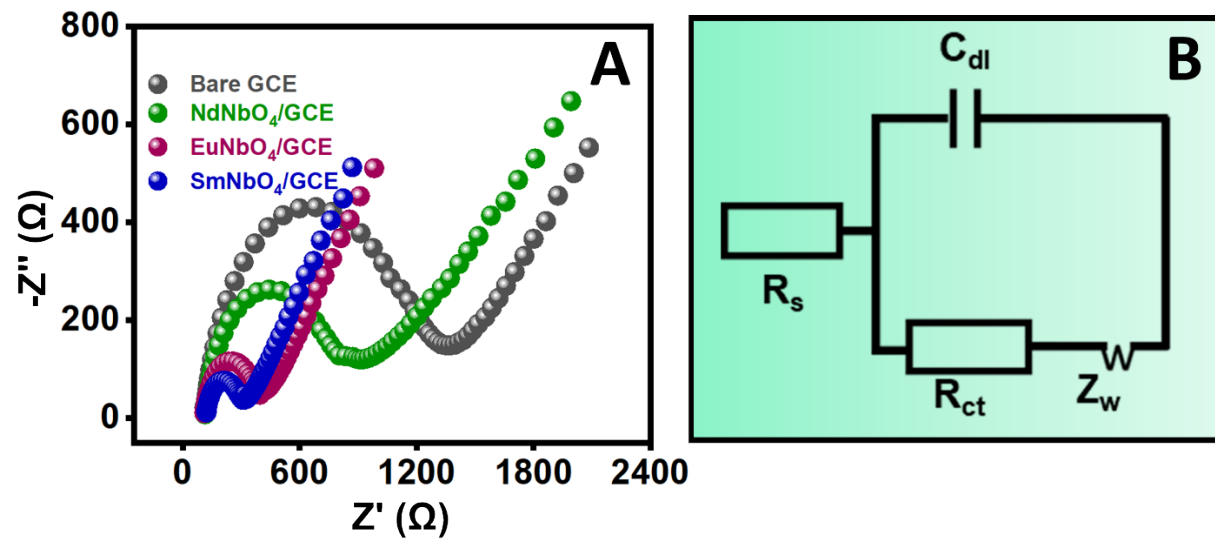

**Figure S1: (A) Nyquist plots corresponding to different electrodes; (B) Randles's equivalent circuit in EIS studies**

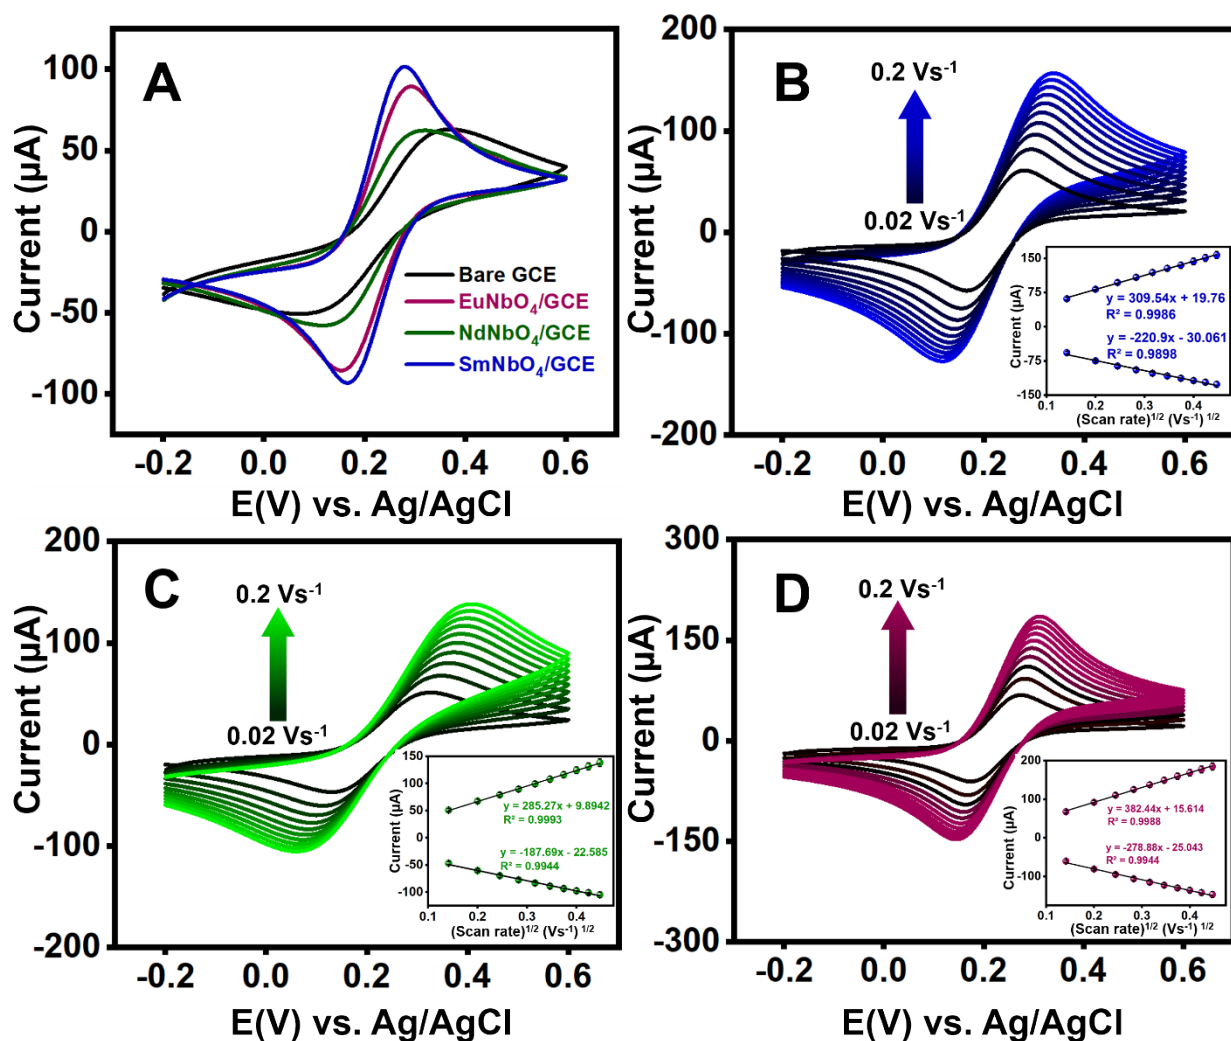

Figure S2: (A) Cyclic voltammograms for different electrodes (Bare and modified); CV profile of (B)  $\text{SmNbO}_4/\text{GCE}$ , (C)  $\text{NdNbO}_4/\text{GCE}$  (D)  $\text{NdNbO}_4/\text{GCE}$  for varying scan rates from 0.02-0.2  $\text{Vs}^{-1}$ ; (Inset) Calibrated plot of the square root of scan rate versus anodic and cathodic peak currents; All the above experiments were performed in  $[\text{Fe}(\text{CN})_6]^{3-/4-}$  in 0.1 M KCl as electrolyte.

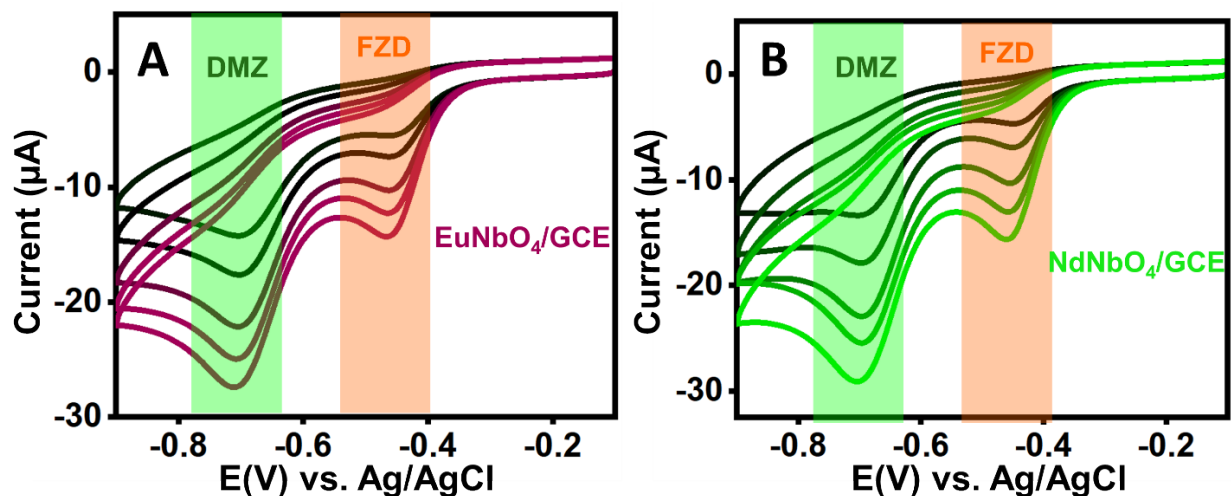

Figure S3: CV profile of 100  $\mu\text{M}$  of FZD and DMZ at various  $\text{EuNbO}_4$  and  $\text{NdNbO}_4$  electrodes

Table S3: Comparison of previous literature about DMZ detection with the proposed  $\text{SmNbO}_4/\text{GCE}$  sensor.

| Method                  | Electrode                                                   | Electrolyte                               | LOD ( $\mu\text{M}$ ) | Linear range ( $\mu\text{M}$ ) | References       |
|-------------------------|-------------------------------------------------------------|-------------------------------------------|-----------------------|--------------------------------|------------------|
| <sup>a</sup> HPLC-UV    | -                                                           | -                                         | 0.5                   | 0–100                          | [1]              |
| <sup>b</sup> GC-ECNI-MS | -                                                           | BSA                                       |                       | 0.1–0.6                        | [2]              |
| <sup>c</sup> LC-MS-MS   | -                                                           | $\text{H}_2\text{O}-\text{CH}_3\text{CN}$ | 0.5                   | 0–10                           | [3]              |
| CV                      | $\mu\text{Ag}@^{\text{d}}\text{CPE}$                        | PB/7.0                                    | 0.6565                | 350–1                          | [4]              |
| <sup>e</sup> DPSV       | <sup>f</sup> MIS-CPE                                        | PB/5.0                                    | 3.6                   | 0.01–1                         | [5]              |
| i-t                     | <sup>g</sup> rGO/ <sup>h</sup> PB MCs/SPCE                  | PB/4.0                                    | 0.0032                | 0.02–1360                      | [6]              |
| i-t                     | <sup>i</sup> MnT( <i>o</i> -glu)TTCl- <sup>j</sup> chit/GCE | BR/4.3                                    | 0.0027                | 1500–0.0027                    | [7]              |
| LSV                     | $\text{Cu-Pd}@^{\text{k}}\text{TLC}/\text{SPCE}$            | PB/7.0                                    | 0.015                 | 0.15–746.9                     | [8]              |
| DPV                     | $\text{Mn-SnO}@^{\text{l}}\text{rGO}/\text{GCE}$            | PB/7.0                                    | 0.002                 | 0.009–1291                     | [9]              |
| <b>DPV simultaneous</b> | <b><math>\text{SmNbO}_4/\text{GCE}</math></b>               | <b>PB/7.0</b>                             | <b>0.004</b>          | <b>0.01–264</b>                | <b>This work</b> |

<sup>a</sup>High-performance liquid chromatography-ultraviolet spectroscopy

<sup>b</sup>Gas chromatography–electron capture negative ionization mass spectrometry.

<sup>c</sup>Liquid chromatography-tandem mass spectrometry.

<sup>d</sup>Carbon paste electrode.

<sup>e</sup>Differential pulse stripping voltammetry.

<sup>f</sup>Molecularly imprinted siloxane.

<sup>g</sup>Reduced graphene oxide.

<sup>h</sup>Prussian blue microcubes.

<sup>i</sup>5,10,15,20-tetrakis[2-(2,3,4,6-tetraacetyl- $\beta$ -D-glucopyranosyl)–1-*O*-phenyl]porphyrin

<sup>j</sup>Chitosan

<sup>k</sup>teak leaves carbon

**Table S4: Comparison of previous literature about DMZ detection with the proposed SmNbO<sub>4</sub>/GCE sensor.**

| Method                         | Electrode                    | Electrolyte   | LOD ( $\mu$ M) | Linear range ( $\mu$ M) | References       |
|--------------------------------|------------------------------|---------------|----------------|-------------------------|------------------|
| CV                             | <sup>a</sup> MWCNT/GCE       | 0.04 M/BR 6.0 | 2.30           | 3.0–800                 | [10]             |
| DPV                            | MWCNT/GCE                    |               | 0.080          | 0.49–59                 | [11]             |
| <sup>b</sup> SWV               | <sup>c</sup> SMDE            | 0.1 M/PB 6.0  | 0.023          | 0.088–3.99              | [12]             |
| <sup>d</sup> DPSV <sup>g</sup> | Gr/Au/GCE                    | 0.04 M/BR 6.0 | 0.012          | 0.02–0.14;<br>0.14–400  | [13]             |
| I-T <sup>f</sup>               | Gr/Au/GCE                    | 0.04 M/BR 6.0 | 0.064          | 1.0–674.0               | [13]             |
| DPV                            | <sup>e</sup> GDS/GCE         | 0.05 M/PB 7.0 | 0.023          | 0.01–153.2              | [14]             |
| DPV                            | <sup>f</sup> BV/SPCE         | 0.05 M/PB 7.0 | 0.016          | 0.1–1189.8              | [15]             |
| <b>DPV<br/>simultaneous</b>    | <b>SmNbO<sub>4</sub>/GCE</b> | <b>PB/7.0</b> | <b>0.002</b>   | <b>0.01–264</b>         | <b>This work</b> |

<sup>a</sup>Multiwalled carbon nanotube.

<sup>b</sup>Square wave voltammetric.

<sup>c</sup>Stationary mercury dropping electrode.

<sup>d</sup>Differential pulse stripping voltammetry.

<sup>e</sup>Gadolinium stannate

<sup>f</sup>Bismuth vanadate.

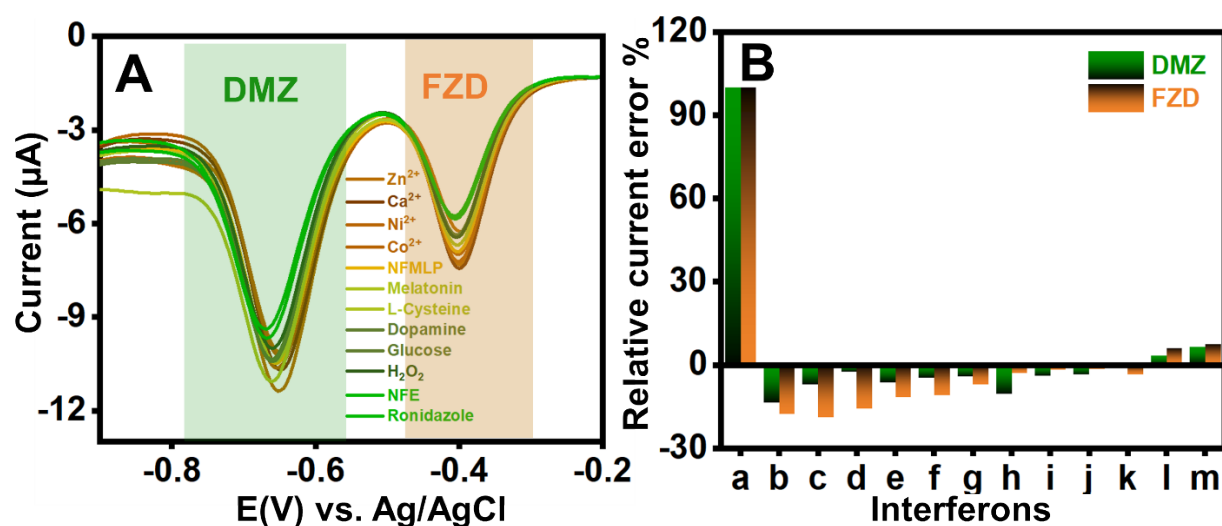

Figure S4: (C) Monitoring cathodic peak currents of FZD and DMZ in the presence of interfering compounds; (D) Plot of different interferon versus relative current error percentage.

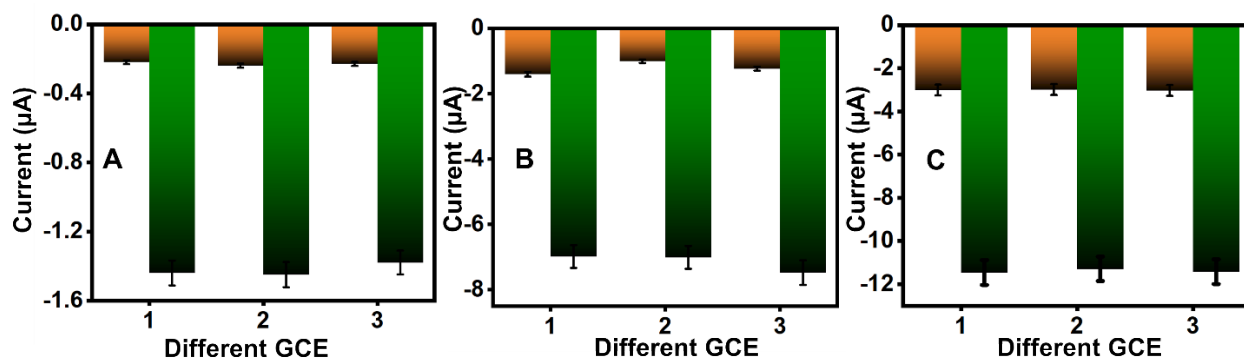

**Figure S5:** Reproducibility of SmNbO<sub>4</sub>/GCE sensor using different GCE for (A) 10  $\mu$ M, (B) 100  $\mu$ M, and (C) 200  $\mu$ M, of FZD and DMZ

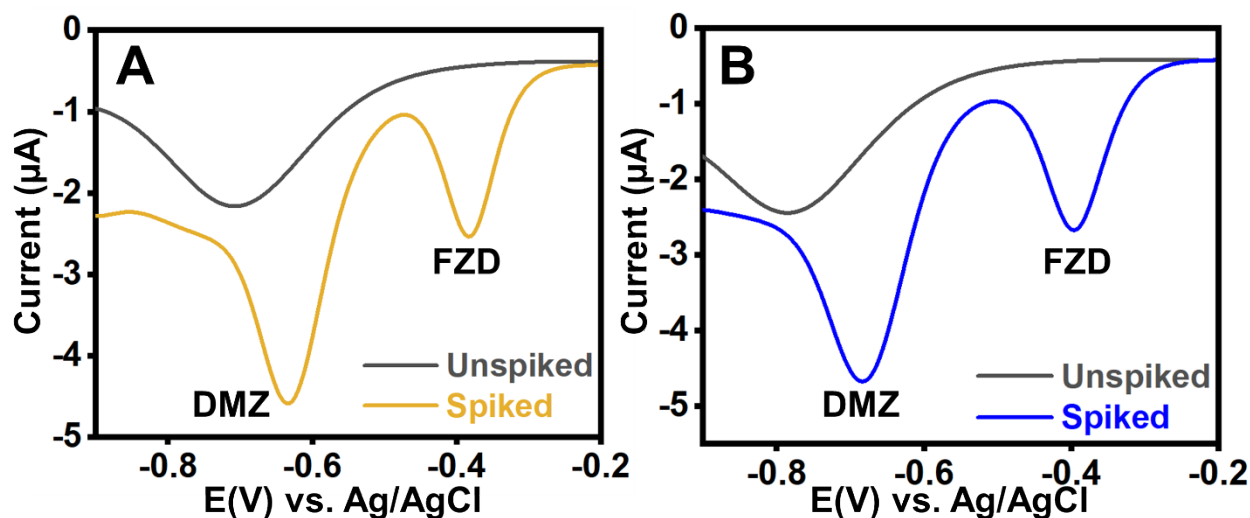

**Figure S6:** DPV analysis of FZD and DMZ in (A) saliva and (B) water samples medium (spiked and unspiked).

**Table S5:** RSD values of SmNbO<sub>4</sub>/GCE sensor for different concentration of FZD and DMZ.

| Concentration        | RSD of FZD | RSD of DMZ |
|----------------------|------------|------------|
| 10 $\mu$ M (Low)     | 0.66 %     | 0.78 %     |
| 100 $\mu$ M (Medium) | 1.64 %     | 3.88 %     |
| 200 $\mu$ M(High)    | 4.34 %     | 2.66 %     |



**Table S6: Real samples with recovery percentage for DMZ and FZD**

| Samples       | Analyte | Added (nM) | DPV<br>Found (nM) | DPV<br>Recovery (%) |
|---------------|---------|------------|-------------------|---------------------|
| Saliva sample | DMZ     | 0          | 0                 | -                   |
|               |         | 5          | 4.94              | 98.8 %              |
|               | FZD     | 0          | 0                 | -                   |
|               |         | 5          | 4.84              | 96.8 %              |
| River Water   | DMZ     | 0          | 0                 | -                   |
|               |         | 5          | 4.91              | 98.2 %              |
|               | FZD     | 0          | 0                 | -                   |
|               |         | 5          | 4.77              | 95.4 %              |

## References

1. Sams, M.J., Strutt, P.R., Barnes, K.A., Damant, A.P. and Rose, M.D., 1998. Determination of dimetridazole, ronidazole and their common metabolite in poultry muscle and eggs by high performance liquid chromatography with UV detection and confirmatory analysis by atmospheric pressure chemical ionisation mass spectrometry. *Analyst*, 123(12), pp.2545-2549.
2. Ho, C., Sin, D.W., Wong, K.M. and Tang, H.P., 2005. Determination of dimetridazole and metronidazole in poultry and porcine tissues by gas chromatography–electron capture negative ionization mass spectrometry. *Analytica chimica acta*, 530(1), pp.23-31.
3. Daeseleire, E., De Ruyck, H. and Van Renterghem, R., 2000. Rapid confirmatory assay for the simultaneous detection of ronidazole, metronidazole and dimetridazole in eggs using liquid chromatography-tandem mass spectrometry. *Analyst*, 125(9), pp.1533-1535.

4. Zoubir, J., Bakas, I. and Assabbane, A., 2021. A simple platform for the electro-catalytic detection of the dimetridazole using an electrochemical sensor fabricated by electro-deposition of Ag on carbon graphite: application: orange juice, tomato juice and tap water. *Heliyon*, 7(7), p.e07542.
5. Hu, C., Deng, J., Xiao, X., Zhan, X., Huang, K., Xiao, N. and Ju, S., 2015. Determination of dimetridazole using carbon paste electrode modified with aluminum doped surface molecularly imprinted siloxane. *Electrochimica Acta*, 158, pp.298-305.
6. Keerthi, M., Akilarasan, M., Chen, S.M., Kogularasu, S., Govindasamy, M., Mani, V., Ali, M.A., Al-Hemaid, F.M. and Elshikh, M.S., 2018. One-pot biosynthesis of reduced graphene oxide/prussian blue microcubes composite and its sensitive detection of prophylactic drug dimetridazole. *Journal of The Electrochemical Society*, 165(2), p.B27.
7. Gong, F.C., Wu, D.X., Cao, Z. and He, X.C., 2006. A fluorescence enhancement-based sensor using glycosylated metalloporphyrin as a recognition element for levamisole assay. *Biosensors and Bioelectronics*, 22(3), pp.423-428.
8. Veerakumar, P., Koventhan, C. and Chen, S.M., 2023. Copper-palladium alloy nanoparticles immobilized over porous carbon for voltammetric determination of dimetridazole. *Journal of Alloys and Compounds*, 931, p.167474.
9. Selvi, S.V., Rajaji, U., Chen, S.M. and Jebaranjitham, J.N., 2021. Floret-like manganese doped tin oxide anchored reduced graphene oxide for electrochemical detection of dimetridazole in milk and egg samples. *Colloids and Surfaces A: Physicochemical and Engineering Aspects*, 631, p.127733.
10. Fotouhi, L., Nemati, M. and Heravi, M.M., 2011. Electrochemistry and voltammetric determination of furazolidone with a multi-walled nanotube composite film-glassy carbon electrode. *Journal of Applied Electrochemistry*, 41(2), pp.137-142.
11. DUAN, L. and Zhang, L., 2012. Electrochemical behavior of furazolidone at multi-walled carbon nanotubes modified glassy carbon electrode and its analytical application. *J. Anal. Sci*, 5, pp.673-676.
12. Parham, H. and Esfahani, B.A., 2008. Determination of furazolidone in urine by square-wave voltammetric method. *Journal of the Iranian Chemical Society*, 5(3), pp.453-457.

13. He, B.S. and Du, G.A., 2017. A simple and sensitive electrochemical detection of furazolidone based on an Au nanoparticle functionalized graphene modified electrode. *Analytical Methods*, 9(30), pp.4341-4348.
14. Balamurugan, K., Rajakumaran, R., Chen, S.M., Chen, T.W. and Huang, P.J., 2021. Co-precipitation synthesis and characterization of rare-earth pyrochlore Gadolinium stannate; A novel electrocatalyst for the determination of furazolidone in water samples. *Int. J. Electrochem. Sci.*, 16, p.210368.
15. Koventhan, C., Pandiyarajan, S. and Chen, S.M., 2022. Simple sonochemical synthesis of flake-ball shaped bismuth vanadate for voltammetric detection of furazolidone. *Journal of Alloys and Compounds*, 895, p.162315.
